# Supplementary material for: The Mindful Body: A Phenomenology of the Body With Multiple Sclerosis
Source: PubMed Central journal article supplement — Qual Health Res. 2018 Sep 10;28(14):2239–49. doi: 10.1177/1049732318796831 (PMC6249673; doi:10.1177/1049732318796831), 2018-09-10
Supplement: Supplementary_material_.pdf [file Supplementary_material_.pdf]

## Supplementary material

### Interview guide

- Can you tell me something about the way you experience your body?
- Could you give me an example of how you experience your body in care practice? (e.g. neurologist, MRI scan, MS nurse)
- Can you describe a situation of your home environment and the role of your body in this? (e.g. taking a shower, housework, contact with family)
- How does your body appear to you when you are at work? (e.g. performing tasks, conversations with colleagues)
- Can you give an example of how you experience your body in public space? (e.g. supermarket, cinema, street, public transport)
- Can you tell me something about how you experience your body in moments of relaxation? (e.g. reading, painting, sports)
- MS is not the same to anyone. Could you describe your MS?
- How is your body experience changed by MS?
- Can you give an example of a good day? (When was that, what happened, who were you with, how did you feel?)
- Can you give an example of a bad day? (When was that, what happened, who were you with, how did you feel?)
- Can you give an example of a situation where you could concentrate on nothing but your body?
- Could you remember a moment when you forgot about your body?
- In what situation did you feel confronted with your body?
- What does your body tell you about how you are doing?
- How do you pay attention to your body?
